# Supplementary material
Source: Springer Nature journal article supplement (https://www.springermedizin.de/resource/supplementary/12968_2010_1443_MOESM3_ESM.pdf/9580146)

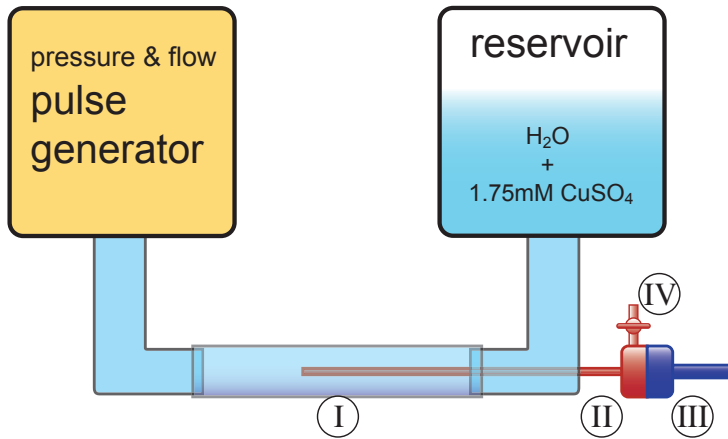

Ⅰ - PVA-C vessel with pressure catheter

Ⅱ - protruding end of pressure catheter

Ⅲ - pressure transducer

Ⅳ - air bleed valves

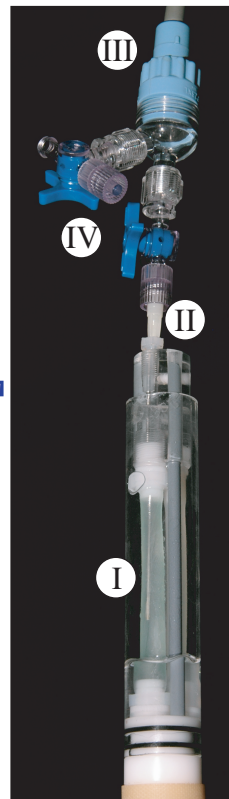

Supplement: MOESM3 [file 9580146]
